# Supplementary material
Source: PubMed Central journal article supplement (PMC7254506)
Supplement: ao0c00419_si_001.pdf [file ao0c00419_si_001.pdf]

Supporting Information

# Enhanced Mechanical Toughness of Isotactic Polypropylene Using Bulk Molybdenum Disulfide

*Vijay S Wadi, Kishore K. Jena, Kevin Halique and Saeed M. Alhassan\**

Department of Chemical Engineering, Khalifa University of Science and Technology,

PO Box 127788, Abu Dhabi, United Arab Emirates (UAE)

\*Corresponding Author:

### Sample Geometry for Tensile Testing

The figure below shows the sample geometry used for the tensile testing. The tensile tests were carried out using an Instron 2519-107, USA universal Testing machine at a crosshead speed of 5 mm/min in displacement control mode at room temperature (19 °C).

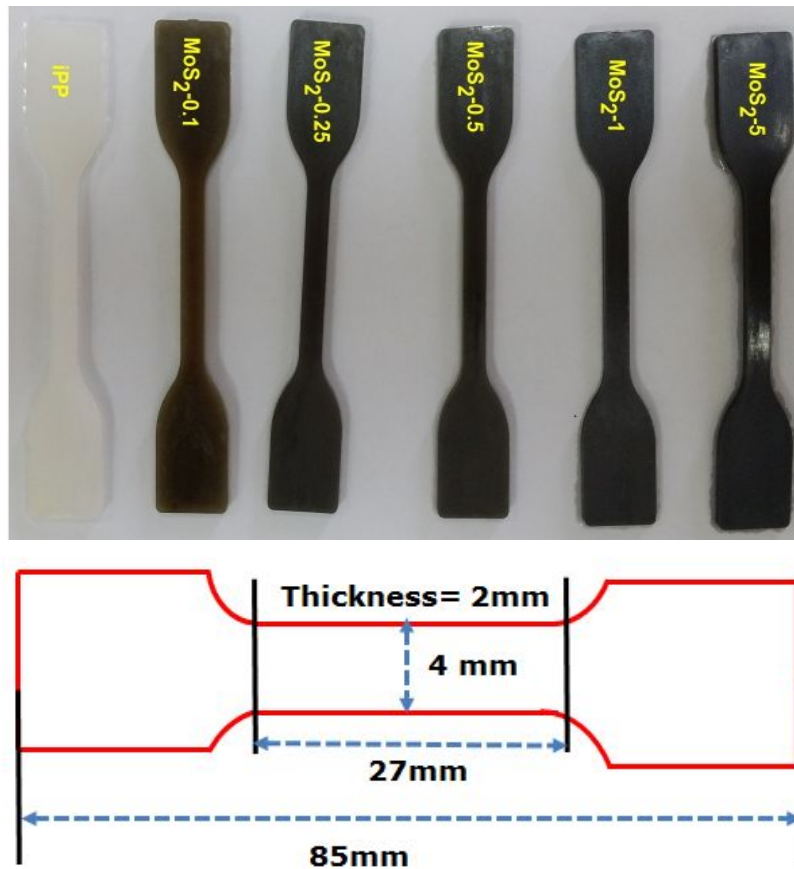

**Figure S1.** Digital image of iPP and iPP-MoS<sub>2</sub> nanocomposites before UTM study. The color of iPP-MoS<sub>2</sub> nanocomposites turned to black green with increase of MoS<sub>2</sub> content. The sample geometry used for the tensile testing.

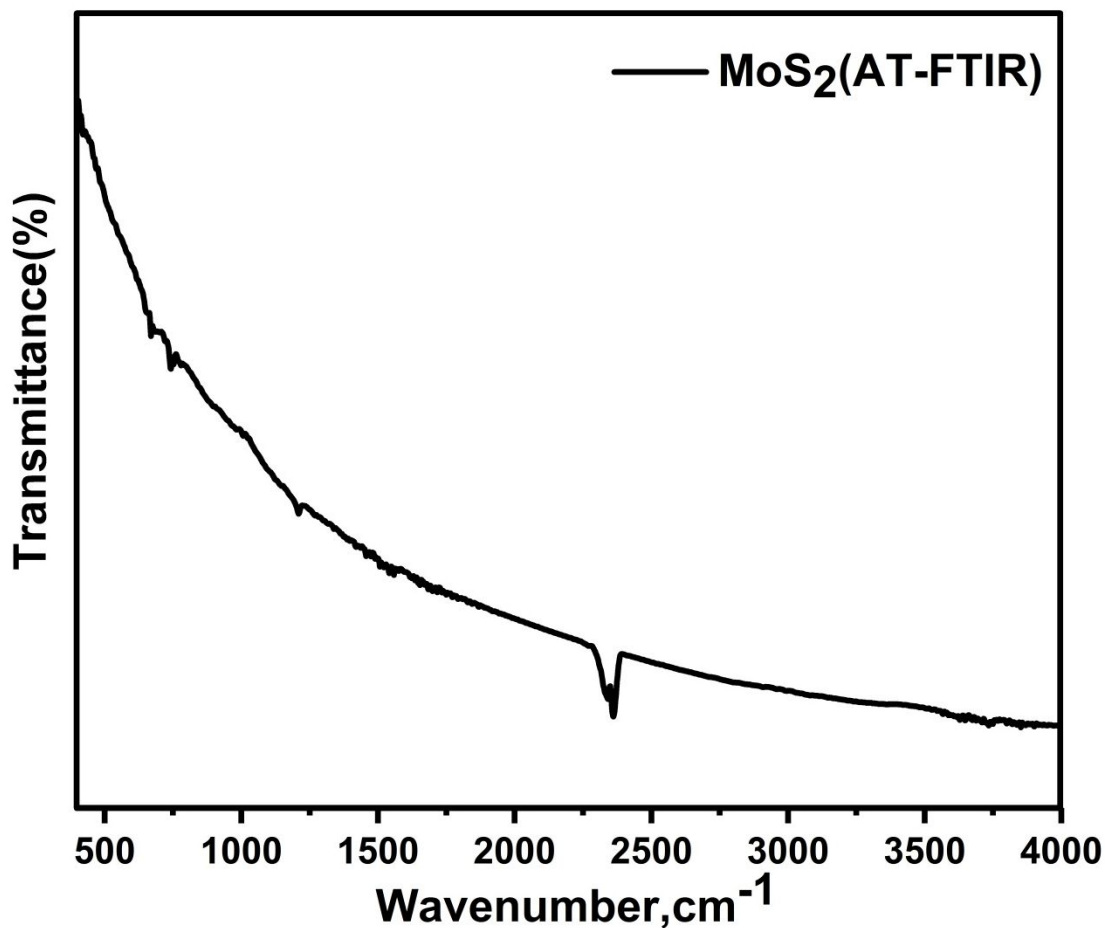

**Figure S2.** AT-FTIR spectra of bulk hexagonal MoS<sub>2</sub>,

AT-FTIR measurement was conducted in the range of 400-4000 cm<sup>-1</sup> to study the chemical compositions and bonds of the samples in the bulk MoS<sub>2</sub>. Results indicate that there is only one weak absorption peak at 474.1 cm<sup>-1</sup> for the bulk MoS<sub>2</sub> powder, which can be ascribed to characteristic (Mo-S)<sub>str</sub> stretching vibration mode of MoS<sub>2</sub>. As can be seen in FTIR spectra, the bulk MoS<sub>2</sub> almost has no any characteristic absorption peaks due to the absence of functional groups on the surface of MoS<sub>2</sub> nano sheets.

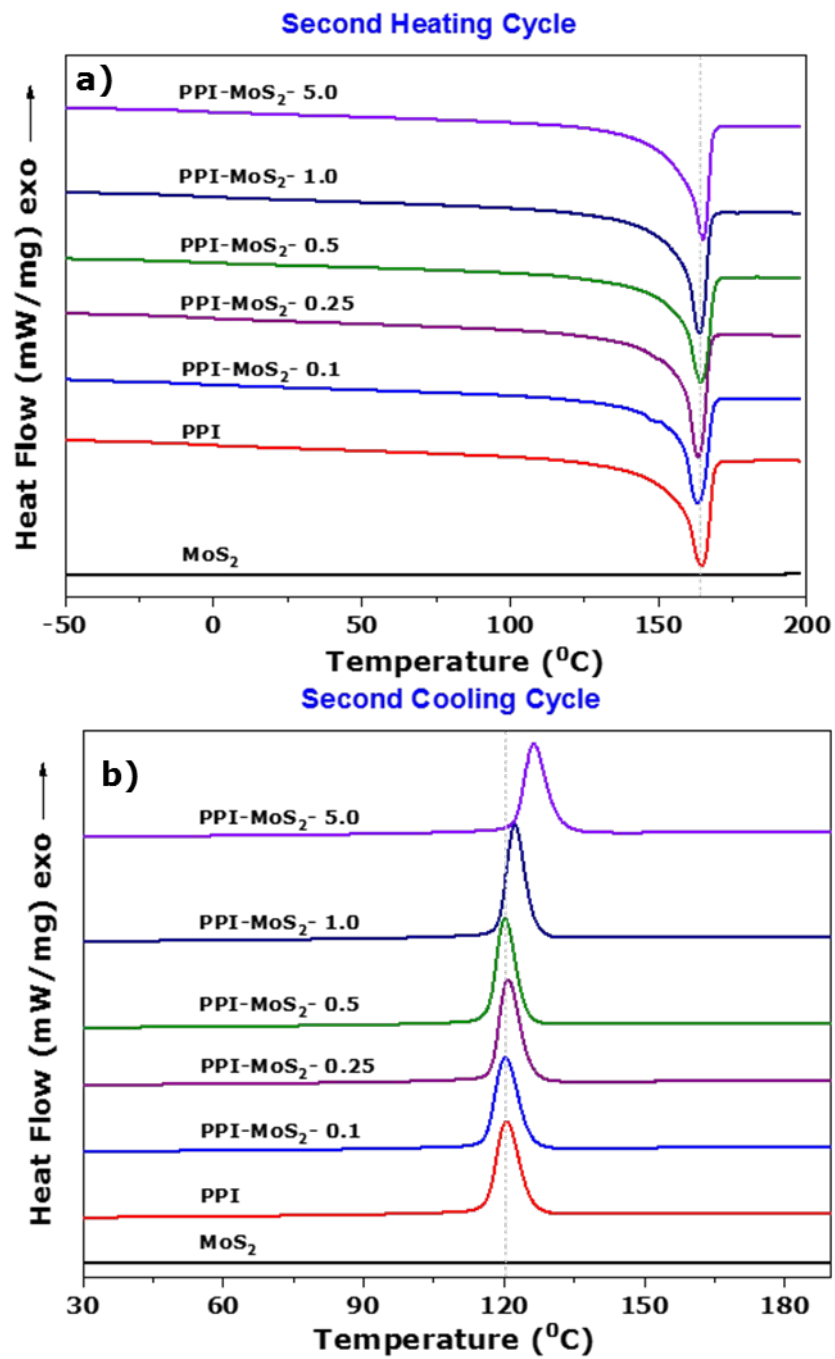

**Figure S3.** (a) Second heating and (b) cooling cycle DSC curves of MoS<sub>2</sub>, iPP and iPP-MoS<sub>2</sub> hybrid composites

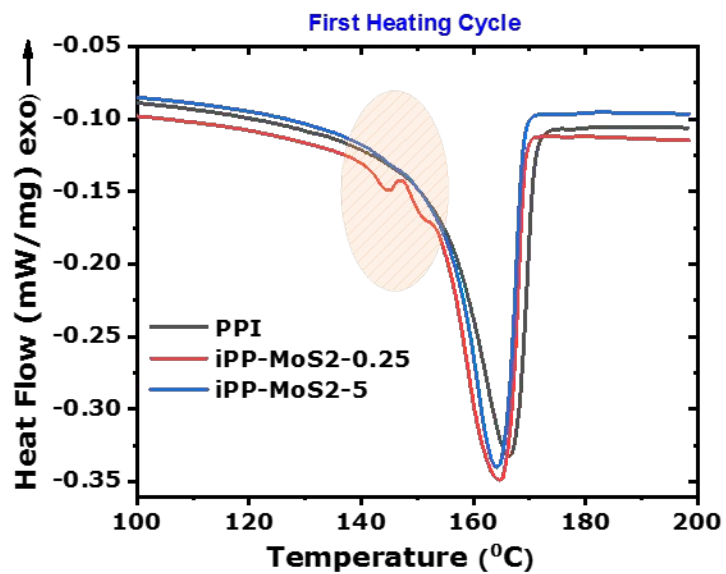

**Figure S4.** First Heating cycle of iPP, iPP-MoS<sub>2</sub>-0.25 and iPP-MoS<sub>2</sub>-5. In thermogram it can be clearly seen that the MoS<sub>2</sub> at lower concentration shows the presence of beta crystal melting peak at around 145°C, whereas this peak is completely absent in pure iPP and iPP-MoS<sub>2</sub>-5 indicating the ability of the MoS<sub>2</sub> to form beat crystals only at lower concentration

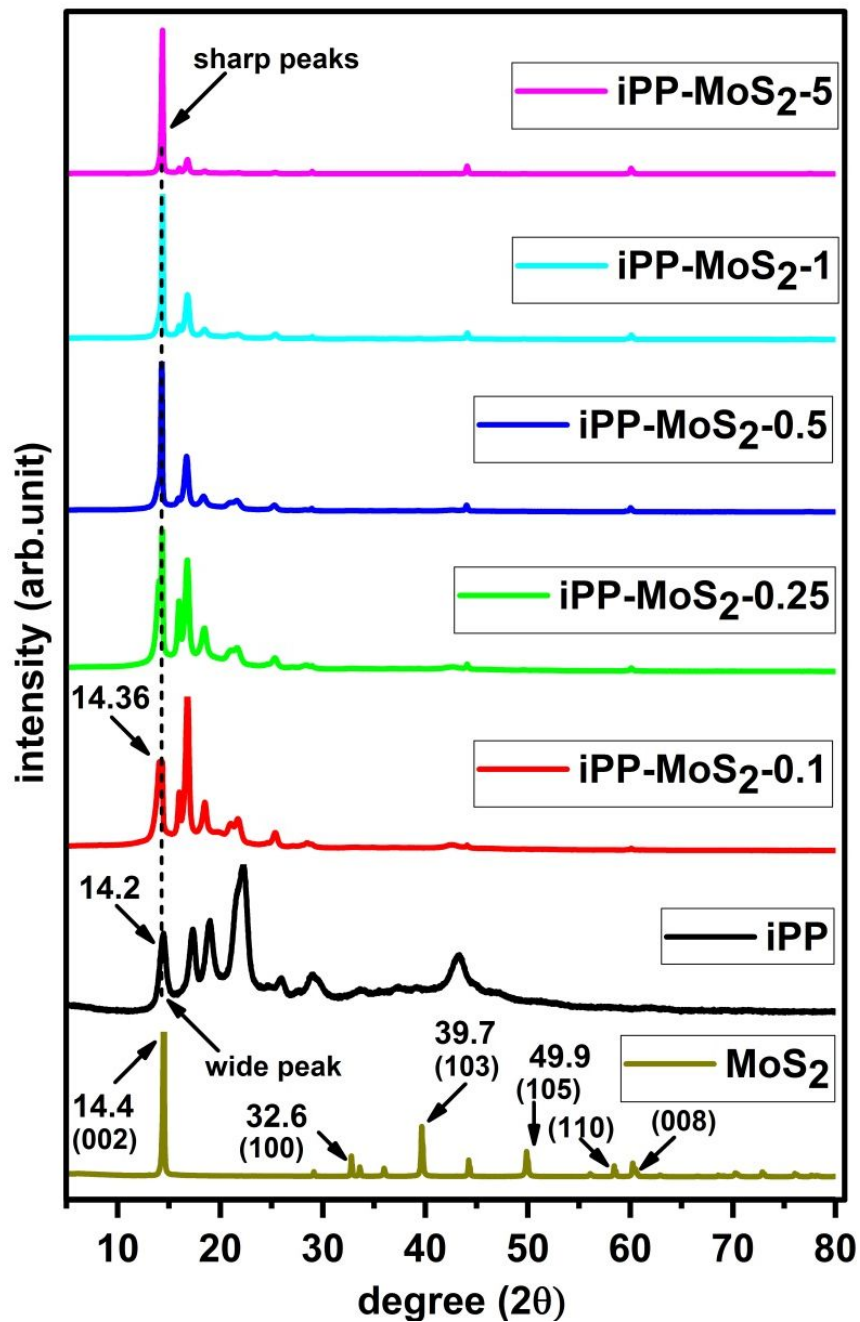

Figure S5. XRD patterns of bulk MoS<sub>2</sub>, pure iPP and iPP-MoS<sub>2</sub> nanocomposites.

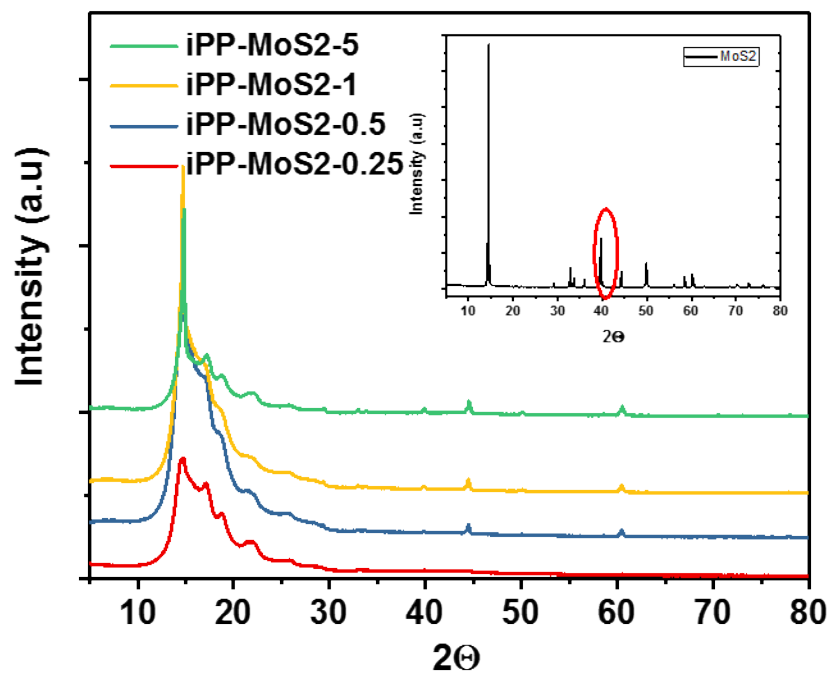

**Figure S6.** XRD patterns of stretched portion of iPP-MoS<sub>2</sub> nanocomposites after UTM test.

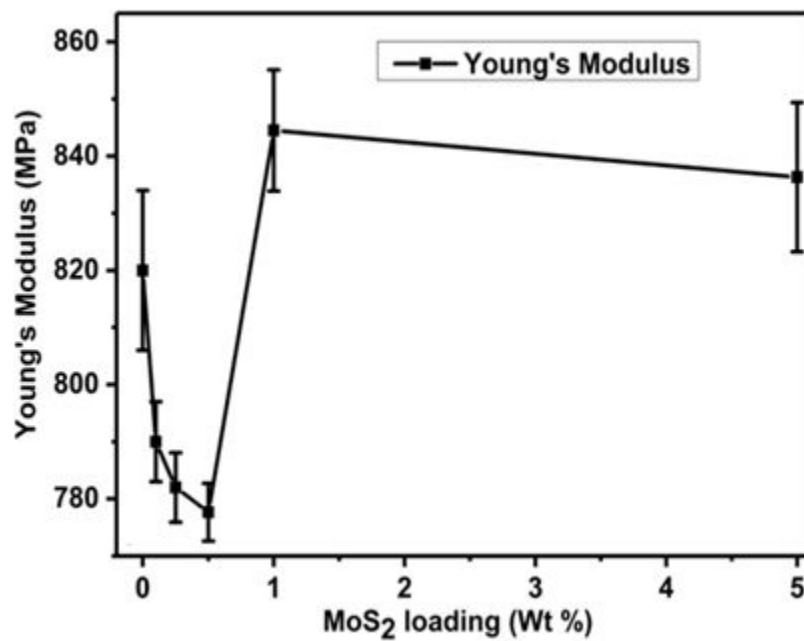

**Figure S7.** Effect of young's modulus at different loading percentage of MoS<sub>2</sub>

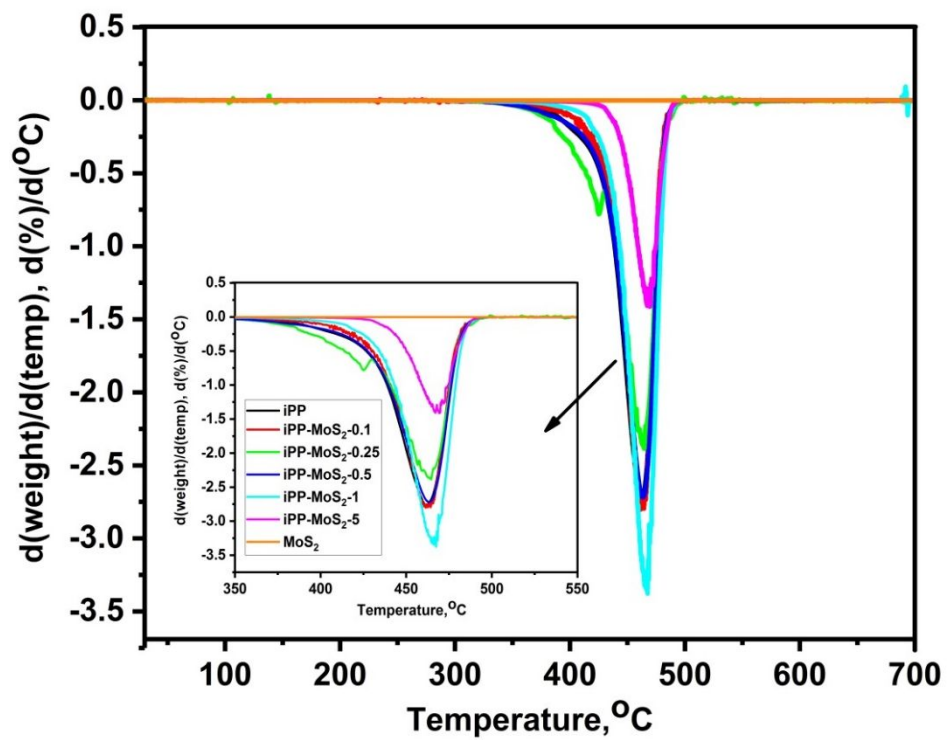

Figure S8. DTG curves of bulk MoS<sub>2</sub> and iPP-MoS<sub>2</sub>-0.5 nanocomposites.



## Tables

Table S1. Mechanical properties of iPP and iPP-MoS<sub>2</sub> nanocomposites.

| <b>Sample Name</b>         | <b>ELONGATION (%)</b> | <b>MODULUS (MPa)</b> | <b>UTS (MPa)</b> |
|----------------------------|-----------------------|----------------------|------------------|
| iPP                        | 152.7±22.0            | 843±14               | 34±0.6           |
| iPP-MoS <sub>2</sub> -0.1  | 620.0±30.0            | 790±7                | 33.1±0.7         |
| iPP-MoS <sub>2</sub> -0.25 | 791.3±67.4            | 782±6.08             | 32.6±0.63        |
| iPP-MoS <sub>2</sub> -0.5  | 683.3±52.6            | 777±5.03             | 32.2±0.16        |
| iPP-MoS <sub>2</sub> -1.0  | 552.7±48.2            | 844±10.6             | 35.6±0.19        |
| iPP-MoS <sub>2</sub> -5.0  | 41.0±4.2              | 836±13.0             | 37.6±0.48        |
